# Supplementary material for: Towards Facile Radiolabeling and Preparation of Gallium-68-/Bismuth-213-DOTA-[Thi8, Met(O2)11]-Substance P for Future Clinical Application: First Experiences
Source: MDPI journal article supplement (doi:10.3390/pharmaceutics13091326), 2021-08-25
Supplement: s1 [file s1]

# Supplementary Materials: Towards Facile Radiolabeling and Preparation of Gallium-68-/Bismuth-213-DOTA-[Thi<sup>8</sup>, Met(O<sub>2</sub>)<sup>11</sup>]-Substance P for Future Clinical Application: First Experiences

Janine Suthiram, Thomas Ebenhan, Biljana Marjanovic-Painter, Mike M. Sathekge and Jan Rijn Zeevaart

**Table S1:** Overview of the <sup>68</sup>Ga/<sup>68</sup>Ge- and the <sup>225</sup>Ac/<sup>213</sup>Bi-generator systems.

**Figure S1:** Representative HPLC-UV analysis (signals at 254 nm wavelength).

**Figure S2:** Radio-chromatograms of generator-derived <sup>68</sup>Ga-activity at different pH values (adjusted with 2.5 M sodium acetate).

**Figure S3:** Radio-ITLC-SG analysis of a crude sample of [<sup>68</sup>Ga]Ga-DOTA-[Thi<sup>8</sup>, Met(O<sub>2</sub>)<sup>11</sup>]SP.

**Figure S4:** Radio-ITLC-SG chromatograms for analysis of [<sup>68</sup>Ga]Ga-DOTA-[Thi<sup>8</sup>, Met(O<sub>2</sub>)<sup>11</sup>]SP quality over time.

**Table S1.** Overview of the <sup>68</sup>Ga/<sup>68</sup>Ge- and <sup>225</sup>Ac/<sup>213</sup>Bi-generator systems.

| Generators               | <sup>68</sup> Ga/ <sup>68</sup> Ge | <sup>225</sup> Ac/ <sup>213</sup> Bi |
|--------------------------|------------------------------------|--------------------------------------|
| Manufacturer             | iThemba LABS                       | ITM Medical Isotopes GmbH            |
| Mother radionuclide      | <sup>68</sup> Ge                   | <sup>225</sup> Ac                    |
| Mother half-life (days)  | 271                                | 10                                   |
| Daughter radionuclide    | <sup>68</sup> Ga                   | <sup>213</sup> Bi                    |
| Daughter half-life (min) | 67.7                               | 45.6                                 |
| Matrix of resin          | Tin dioxide                        | AG-MP-50                             |
| Eluent                   | 0.6 M HCl                          | 0.1 M NaI/0.1 M HCl                  |
| Energy (keV; type)       | 1900; β <sup>+</sup> ; EC          | 435; β <sup>-</sup> ; α (high LET)   |

LET = linear energy transfer; EC = Electron Capture.

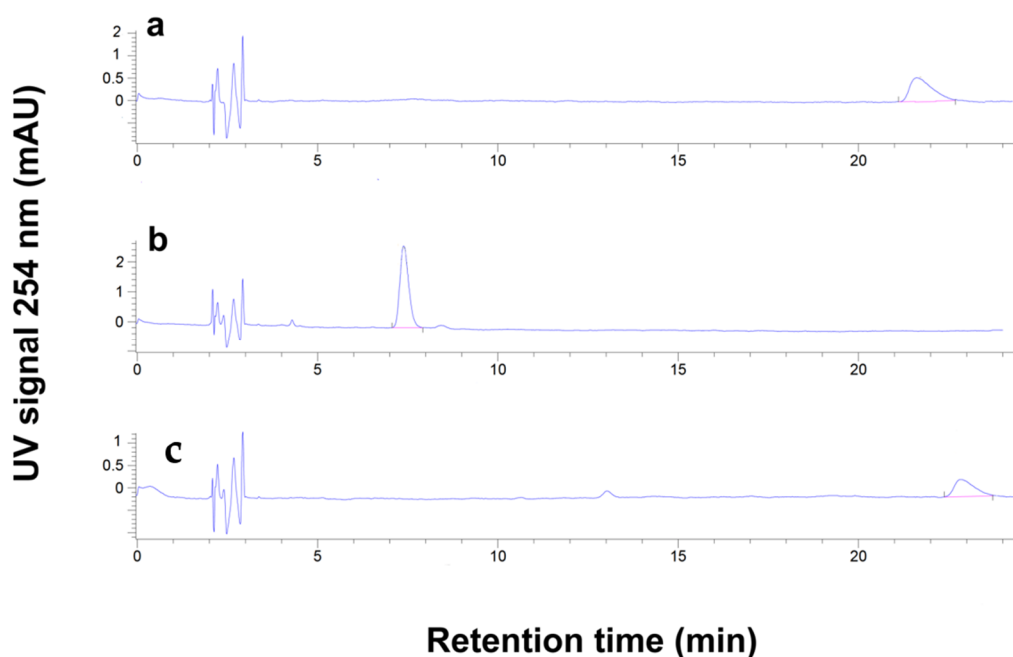

**Figure S1.** Representative HPLC-UV analysis (signal intensity at 254 nm wavelength). The UV signal was detected for retention times of a) DSP (21.8 ± 0.4 min), b) DOTA-[Thi<sup>8</sup>, Met(O<sub>2</sub>)<sup>11</sup>]SP (7.5 ± 0.2 min), and c) SP (22.8 ± 0.4 min). Isocratic HPLC elution was performed using 75% solvent A (0.1% TFA in water) / 25% solvent B (0.1% TFA in acetonitrile); Zorbax SB C18 (4.6 mm x 250 mm; 5 μm) column (40 °C, 1.0 mL/min).

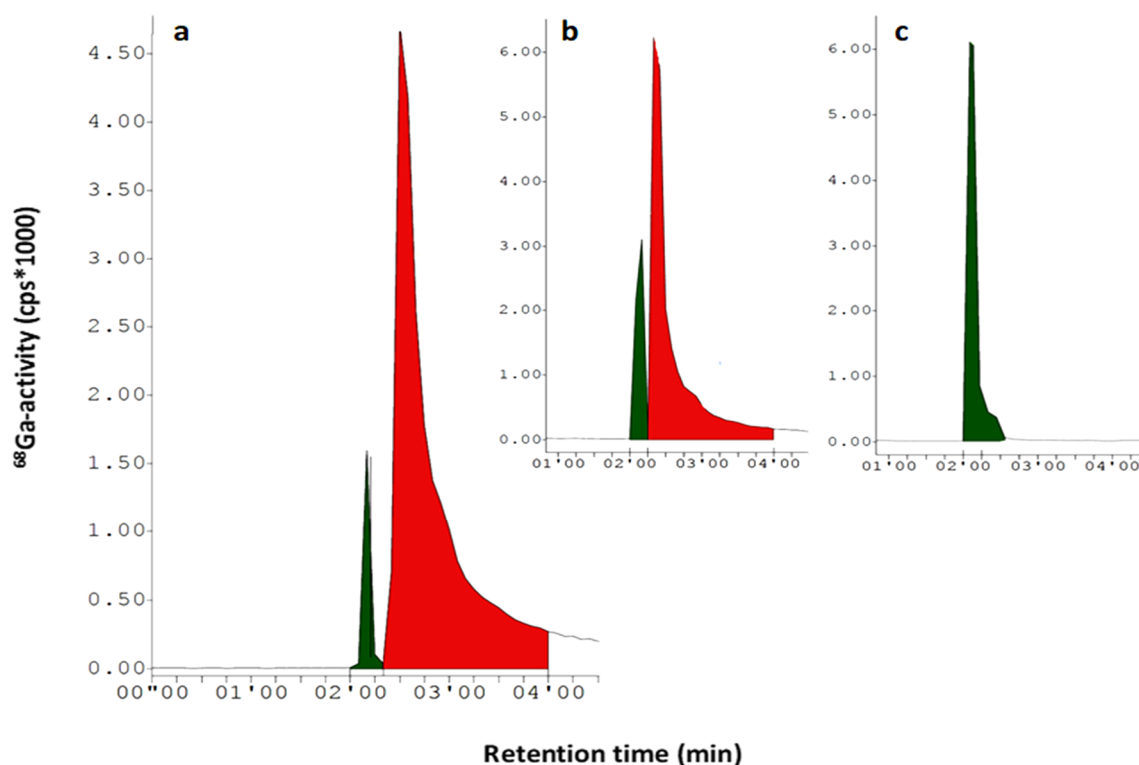

**Figure S2.** Radio-chromatograms of generator-derived  $^{68}\text{Ga}$ -activity adjusted with 2.5 M sodium acetate to obtain different pH: a) pH 3.7, b) pH 3.3, and c) pH 2.3 ( $n=2$ ). Isocratic HPLC elution: 75% solvent A (0.1% TFA in water) / 25% solvent B (0.1% TFA in acetonitrile); Zorbax SB C18 (4.6 mm x 250 mm; 5  $\mu\text{m}$ ) column (40  $^{\circ}\text{C}$ , 1.0 mL/min).

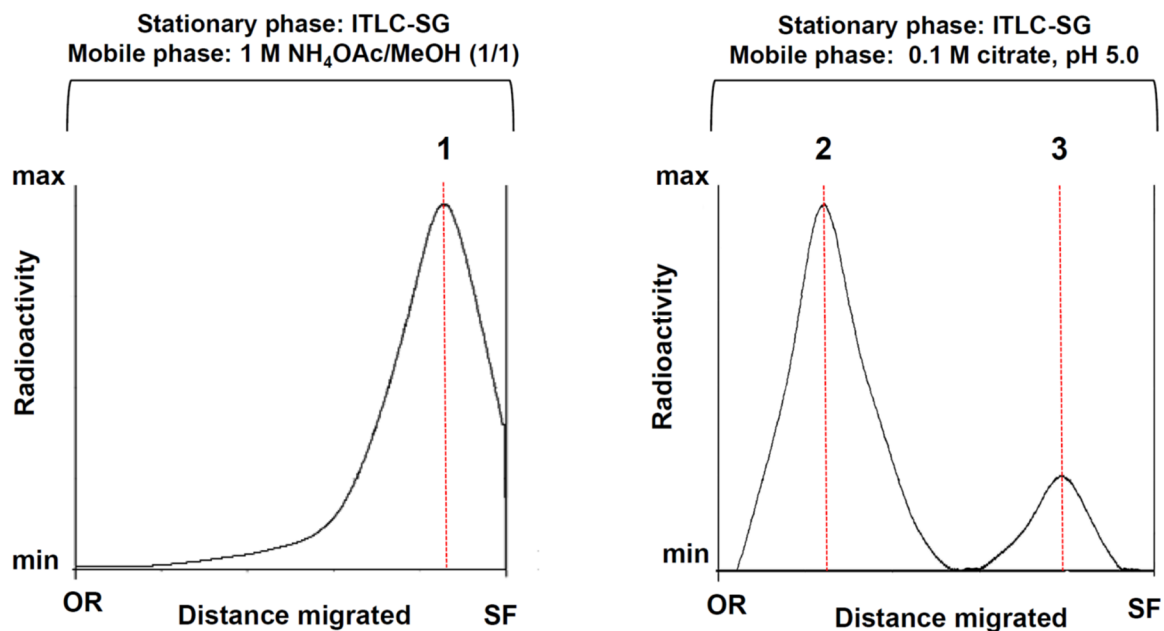

**Figure S3.** Representative crude radio-ITLC chromatograms for  $^{68}\text{Ga}$ -DOTA-[Thi<sup>8</sup>, Met(O<sub>2</sub>)<sup>11</sup>]SP determining the radiolabeling quality of the tracer (right) and presence of  $^{68}\text{Ga}$ -colloids (left). Peak for 1) and 2)  $^{68}\text{Ga}$ -DOTA-[Thi<sup>8</sup>, Met(O<sub>2</sub>)<sup>11</sup>]SP, 3) uncomplexed  $^{68}\text{Ga}$ -activity; SF – solvent front and OR – origin.

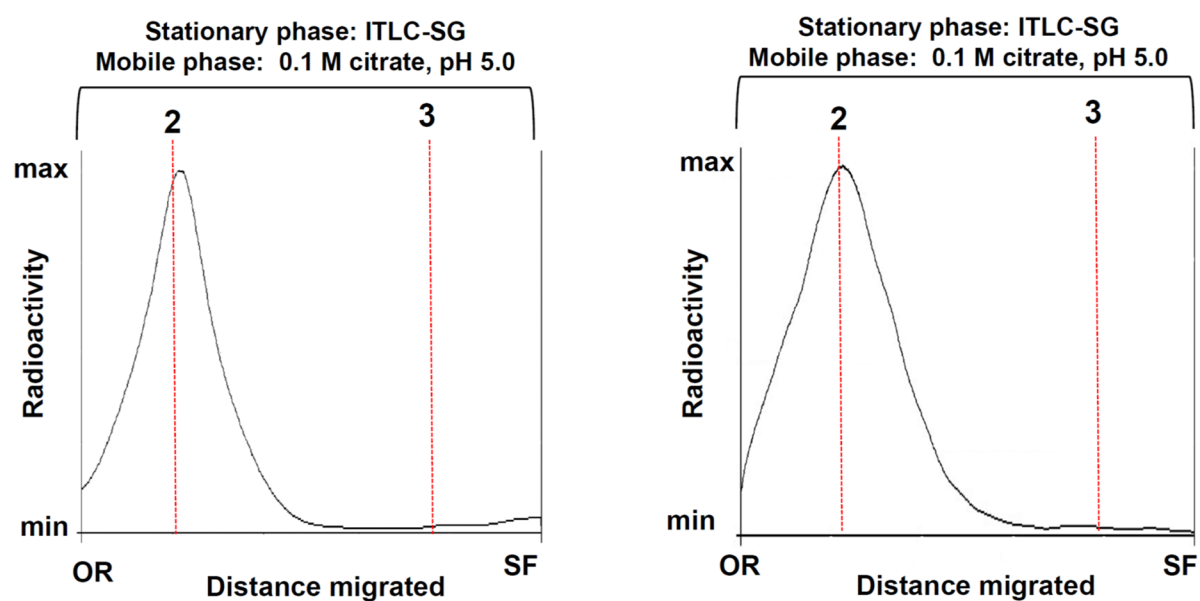

**Figure S4.** Radio-ITLC chromatograms for analysis of product quality over time of [<sup>68</sup>Ga]Ga-DOTA-[Thi<sup>8</sup>, Met(O<sub>2</sub>)<sup>11</sup>]SP immediately after preparation (left) and after 120 min incubation (right) at 37 °C (pH 6.5). Peak for 2) [<sup>68</sup>Ga]Ga-DOTA-[Thi<sup>8</sup>, Met(O<sub>2</sub>)<sup>11</sup>]SP and 3) uncomplexed <sup>68</sup>Ga-activity; SF – solvent front and OR – origin.
